# Supplementary material for: Construction of a Luminescent Cadmium-Based Metal–Organic Framework for Highly Selective Discrimination of Ferric Ions
Source: MDPI journal article supplement (doi:10.3390/molecules26226847), 2021-11-13
Supplement: s1 [file s1]

Supplementary Material

# Construction of a Luminescent Cadmium-Based Metal–Organic Framework for Highly Selective Discrimination of Ferric Ions

Li-Li Xu <sup>1,2</sup>, Qiu-Feng Zhang <sup>1</sup>, Dong Wang <sup>1</sup>, Guang-Wei Wu <sup>1</sup>, and Hong Cai <sup>1,2,\*</sup>

<sup>1</sup> School of Chemistry and Environmental Engineering, Hanshan Normal University, Chaozhou 521041, China; lilyncu@hstc.edu.cn (L.-L.X.); 2017137134@stu.hstc.edu.cn (Q.-F.Z.); wangd@hstc.edu.cn (D.W.); 2015136005@stu.hstc.edu.cn (G.-W.W.)

<sup>2</sup> Guangdong Provincial Key Laboratory of Functional Substances in Medicinal Edible Resources and Healthcare Products, Chaozhou 521041, China

\* Correspondence: glcai@hstc.edu.cn

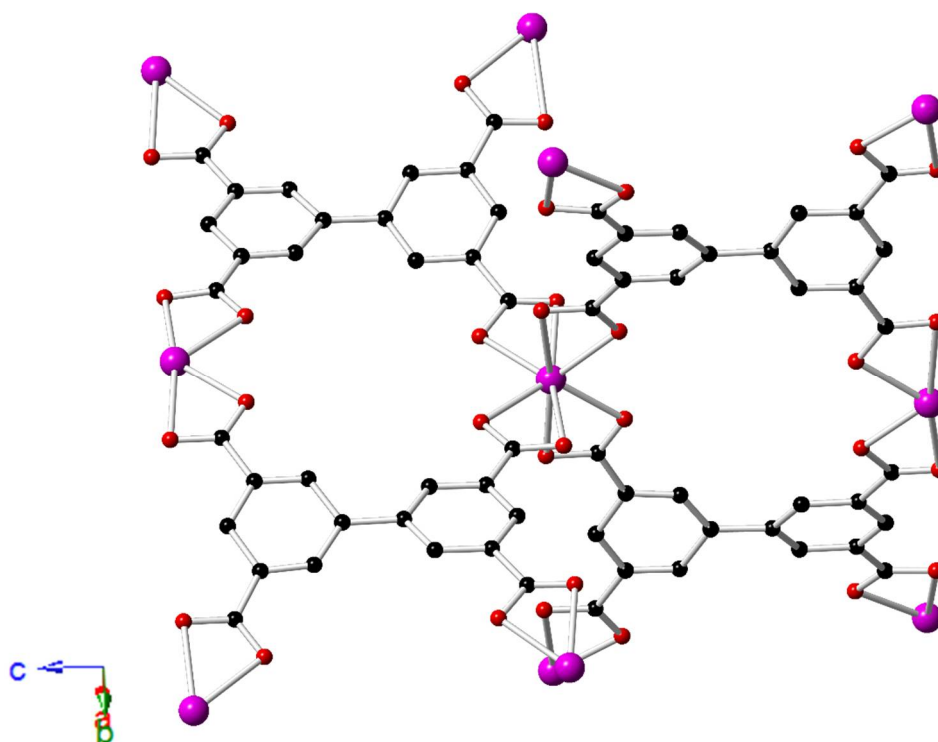

Figure S1. Ball-and-stick view of the coordination environments of  $\text{Cd}^{2+}$  and  $\text{BPTC}^{4-}$  in  $\text{CdBPTC}$ .

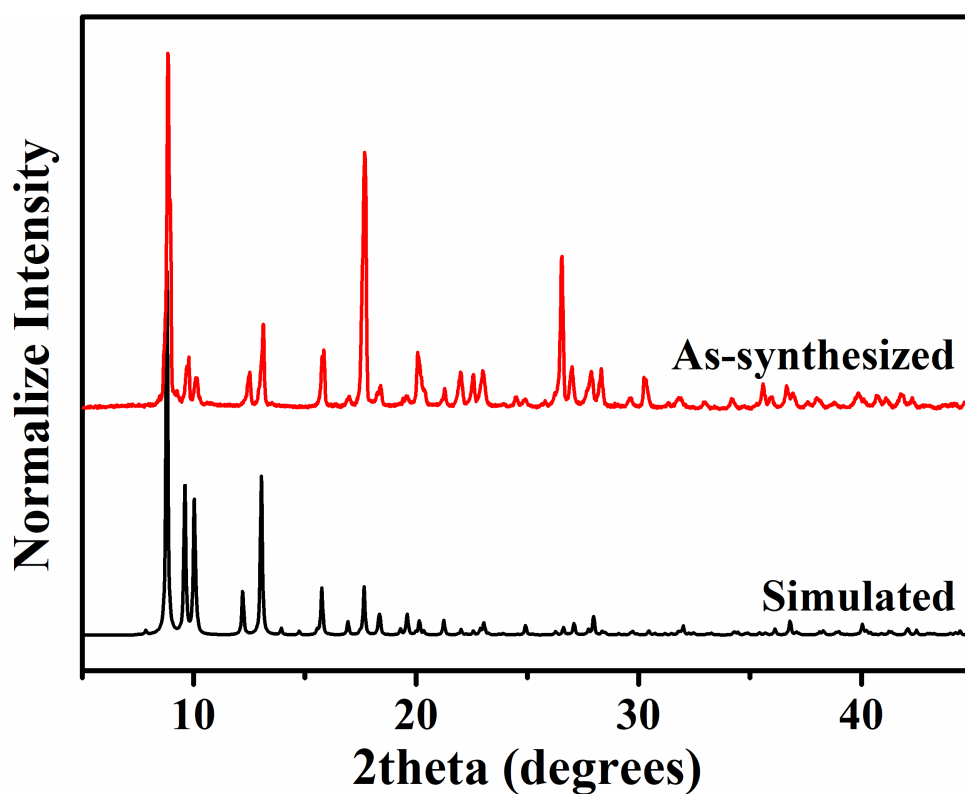

Figure S2. PXRD patterns of CdBPTC.

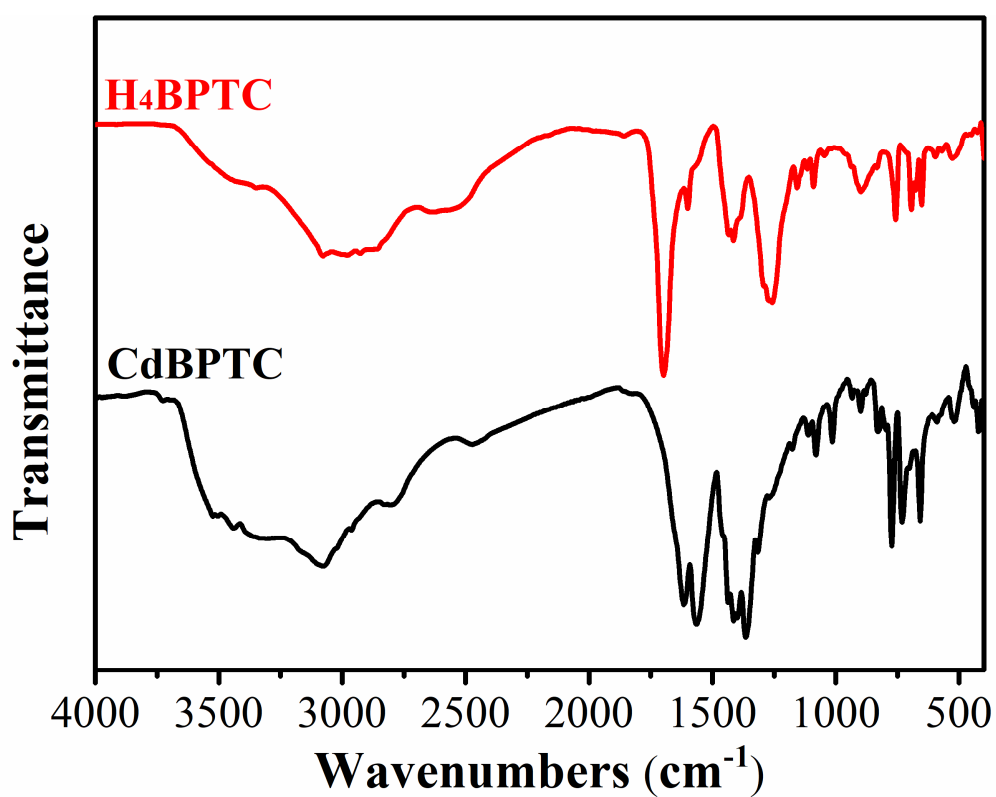Figure S3. IR spectra of CdBPTC and H<sub>4</sub>BPTC ligand.

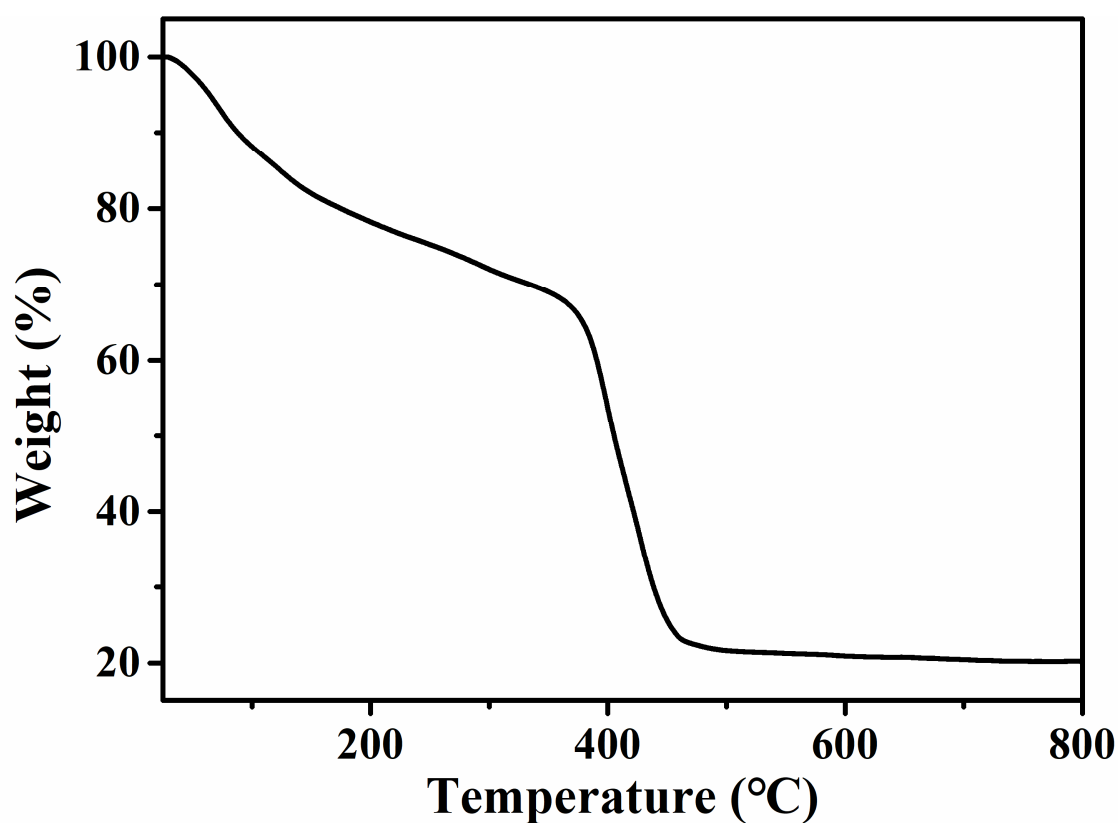

Figure S4. TGA curve of CdBPTC.

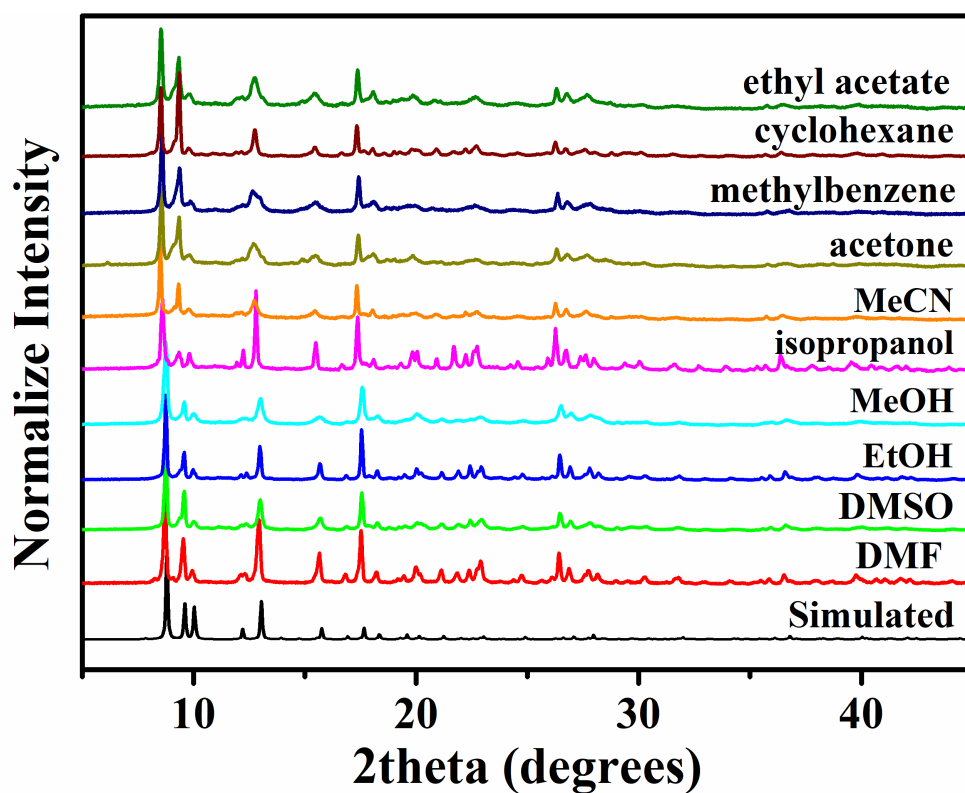

Figure S5. PXRD patterns of CdBPTC soaked in different organic solvents.

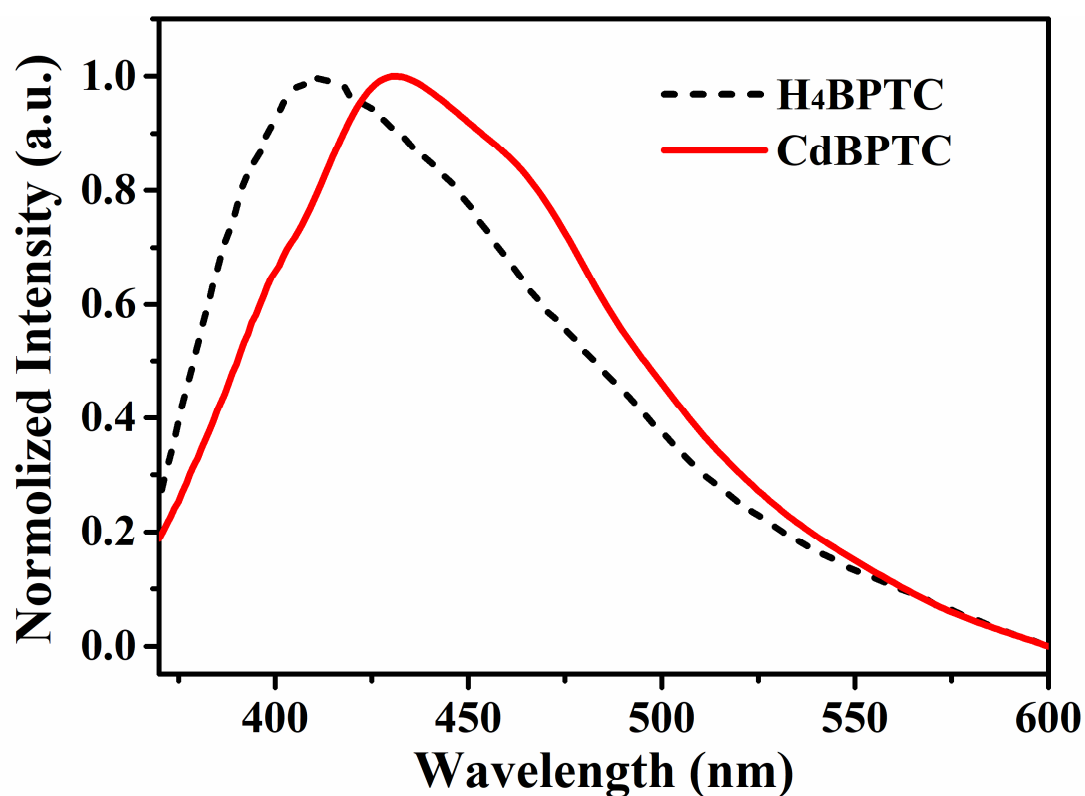

Figure S6. The emission spectra of CdBPTC and H<sub>4</sub>BPTC ligand in solid state at room temperature.

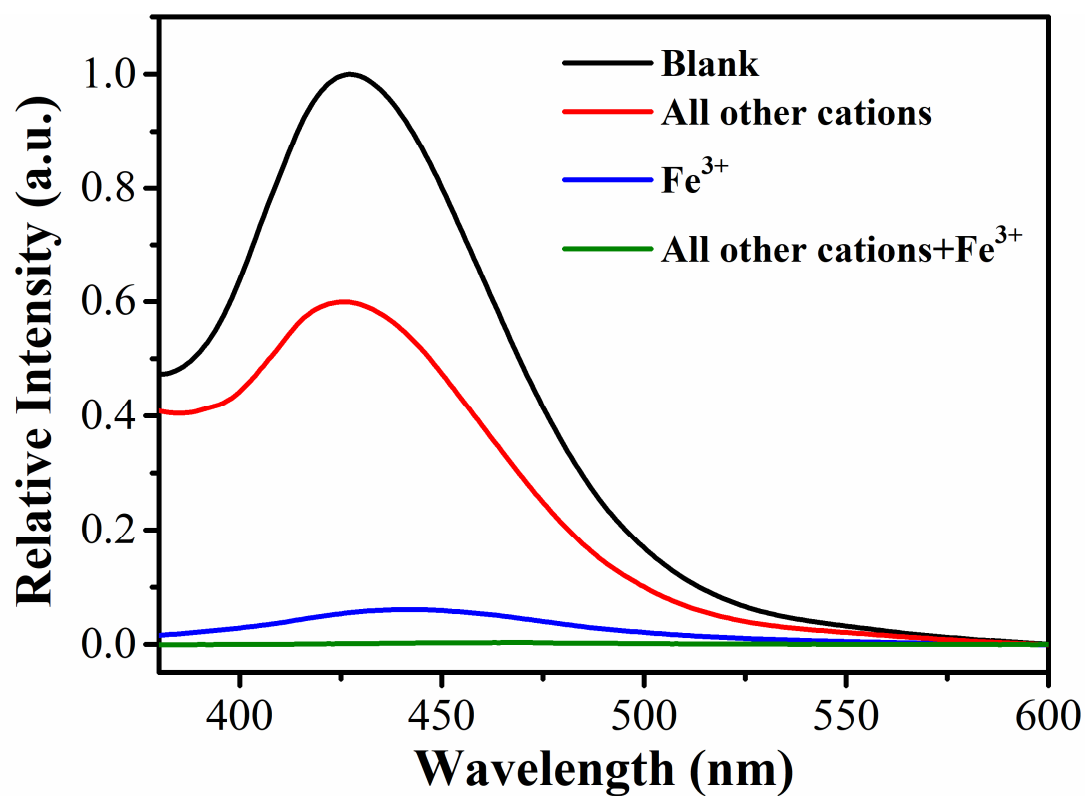

Figure S7. Photoluminescence spectra of CdBPTC in DMF and aqueous solution containing different metal ions ( $1.0 \times 10^{-3} \text{ mol}\cdot\text{L}^{-1}$ ) when excited at 337 nm.

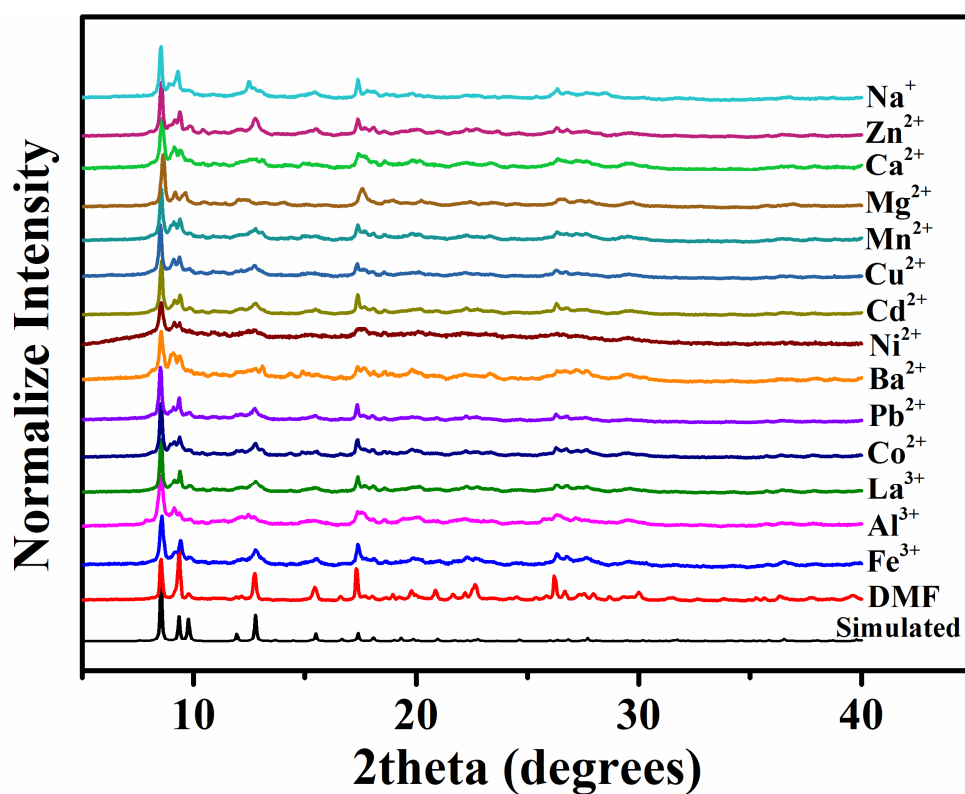

**Figure S8.** PXRD patterns of CdBPTC after being dispersed in DMF and different metal ions solutions for 72 hours.

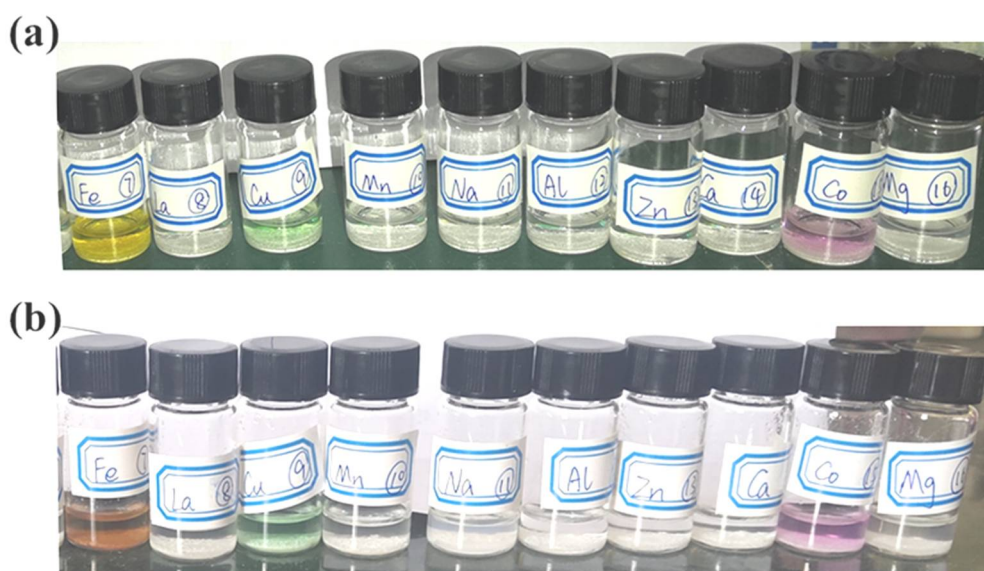

**Figure S9.** Images of CdBPTC powder soaked in DMF solutions of different metal salts ( $1.0 \times 10^{-2} \text{ mol} \cdot \text{L}^{-1}$ ) for 0 hours (a) and 72 hours (b).

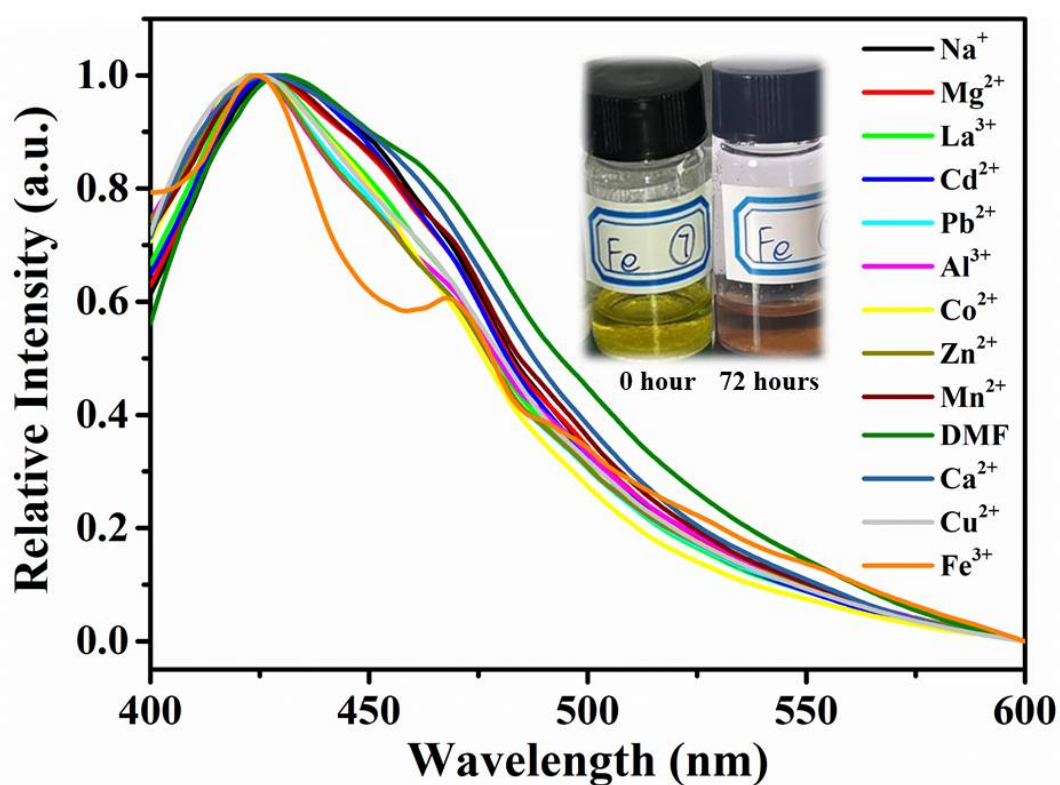

**Figure S10.** Solid emission spectra of CdBPTC after being soaked in pure DMF, DMF solution of  $\text{Fe}^{3+}$  ion, and other cations ( $1.0 \times 10^{-2} \text{ mol}\cdot\text{L}^{-1}$ ) for 72 hours. The inset shows the darker color of the CdBPTC sample after immersion in the solution of ferric ions.

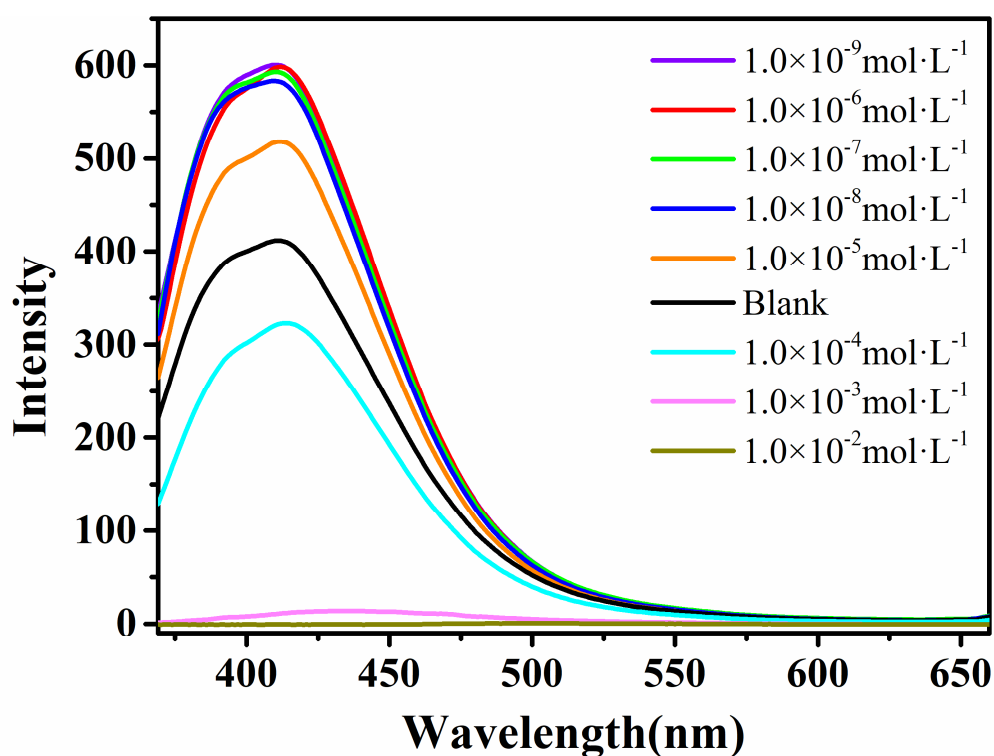

**Figure S11.** Liquid luminescence spectra of CdBPTC presenting turn on and turn off fluorescence signals with different concentrations of  $\text{Fe}^{3+}$  DMF solution at room temperature,  $\lambda_{\text{ex}} = 337 \text{ nm}$ .

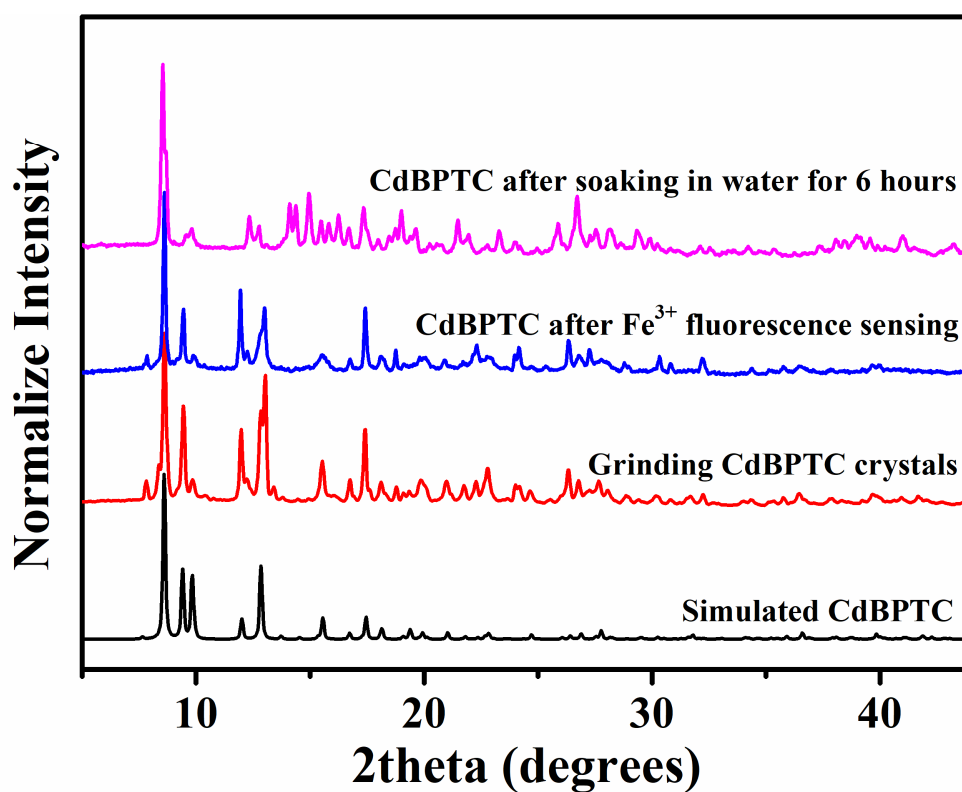

Figure S12. PXRD patterns of CdBPTC after grinding, sensing, or soaking in water.

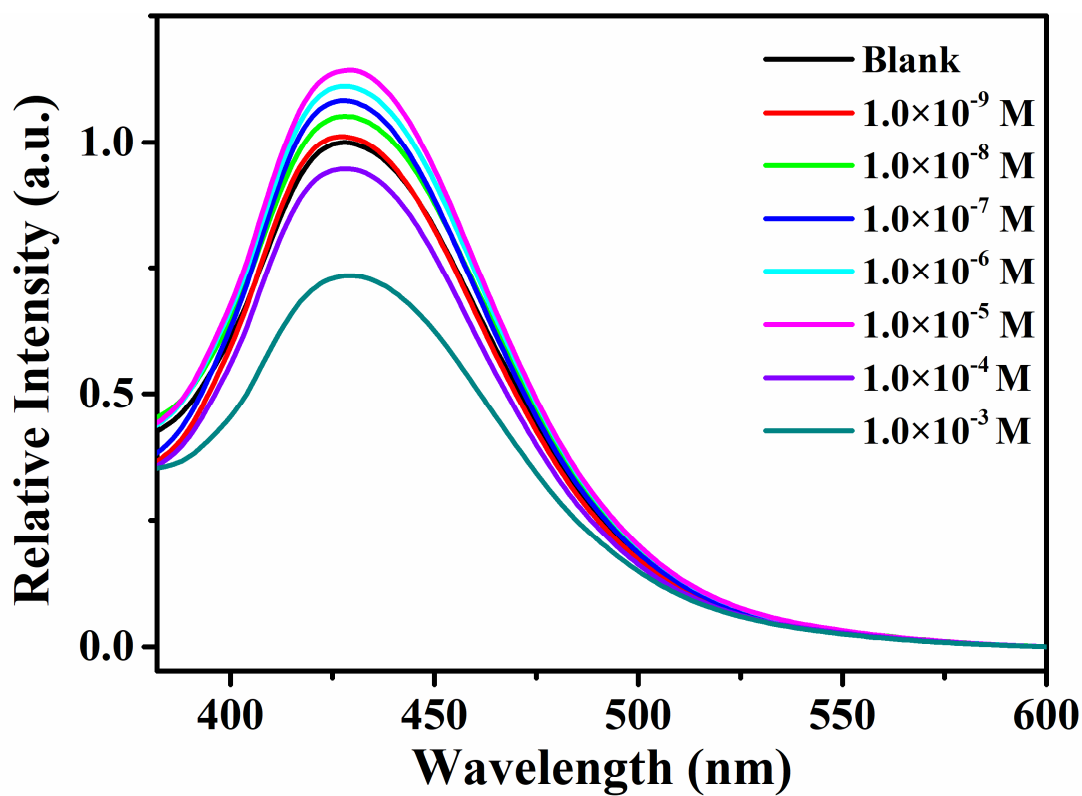

Figure S13. Liquid luminescence spectra of CdBPTC/DMF suspensions with different concentrations of Cr<sup>3+</sup> at room temperature,  $\lambda_{\text{ex}} = 337$  nm.

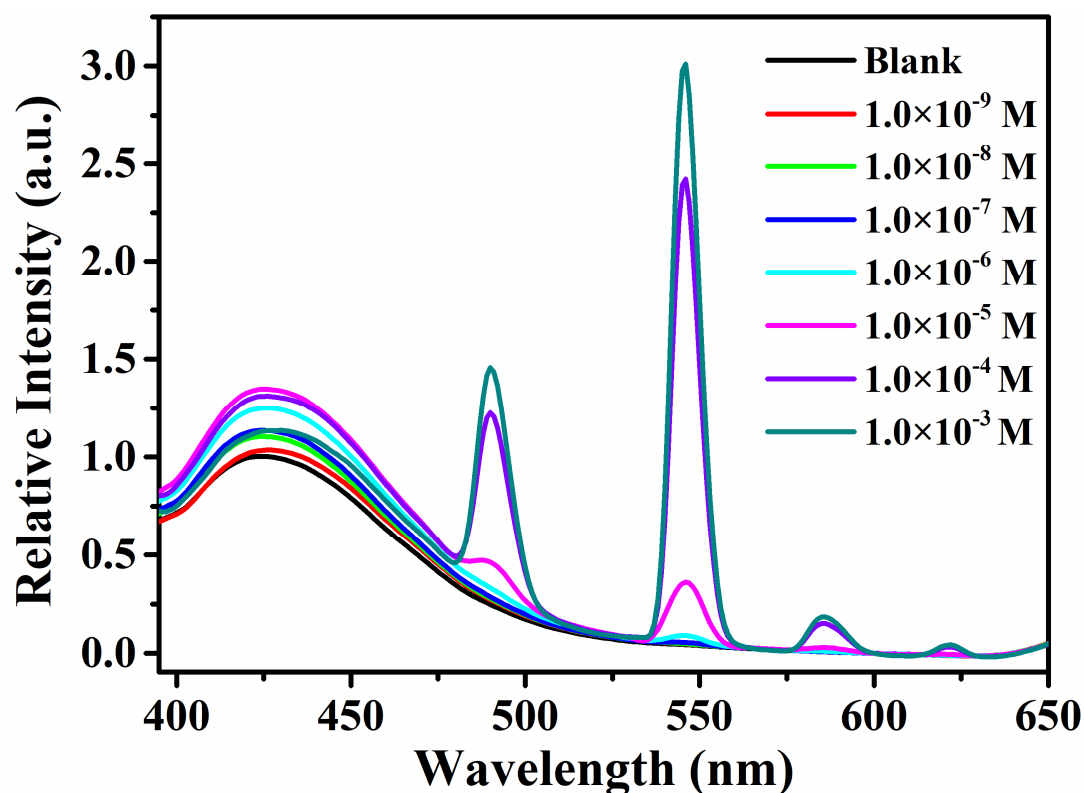

**Figure S14.** Liquid luminescence spectra of CdBPTC/DMF suspensions with different concentrations of Tb<sup>3+</sup> at room temperature,  $\lambda_{\text{ex}} = 337$  nm.

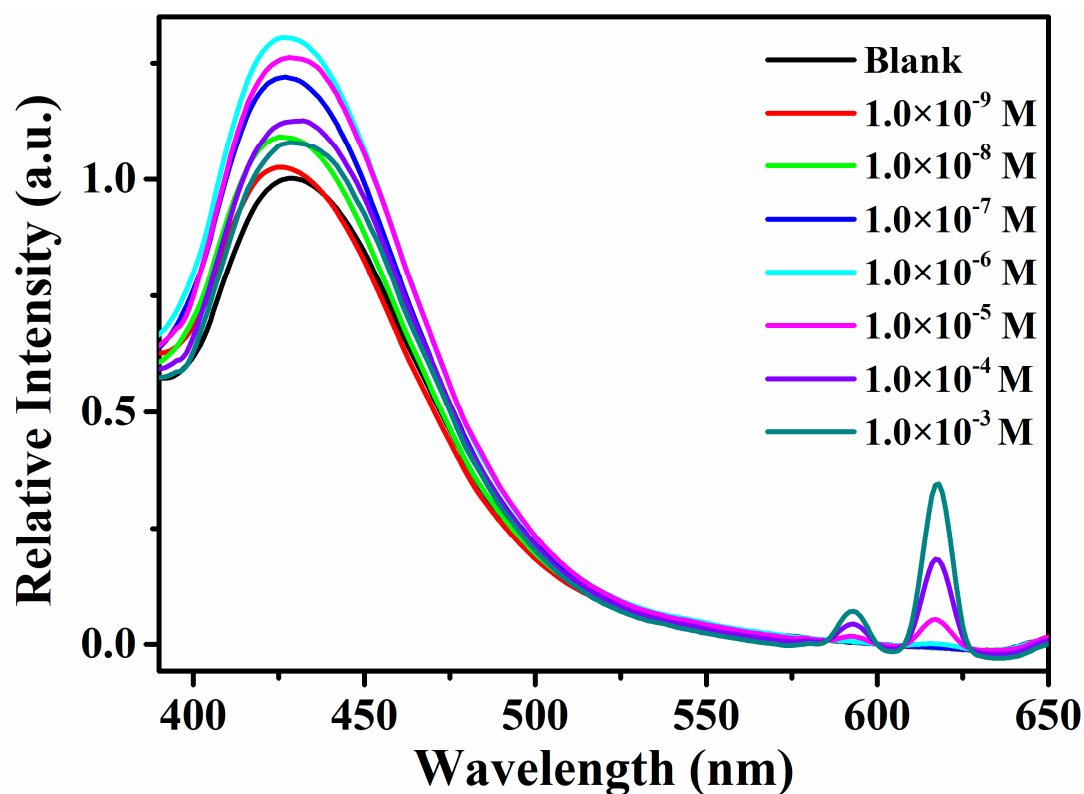

**Figure S15.** Liquid luminescence spectra of CdBPTC/DMF suspensions with different concentrations of Eu<sup>3+</sup> at room temperature,  $\lambda_{\text{ex}} = 337$  nm.



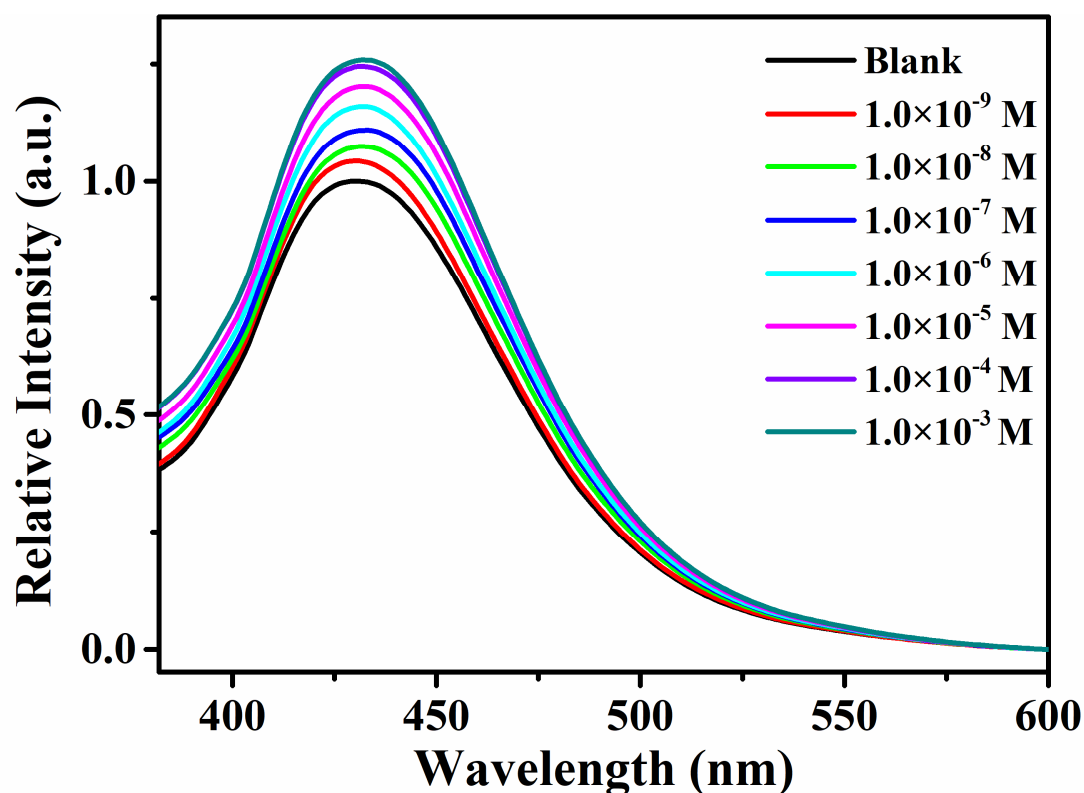

**Figure S16.** Liquid luminescence spectra of CdBPTC/DMF suspensions with different concentrations of  $\text{La}^{3+}$  at room temperature,  $\lambda_{\text{ex}} = 337$  nm.

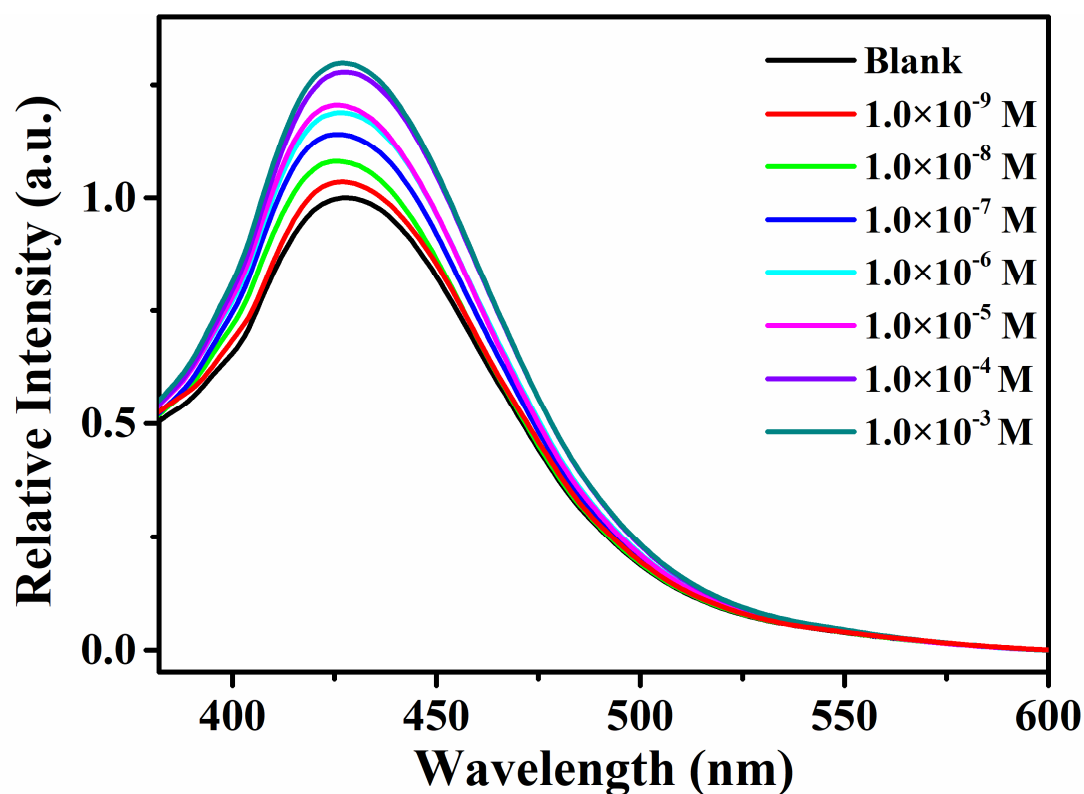

**Figure S17.** Liquid luminescence spectra of CdBPTC/DMF suspensions with different concentrations of  $\text{Mn}^{2+}$  at room temperature,  $\lambda_{\text{ex}} = 337$  nm.

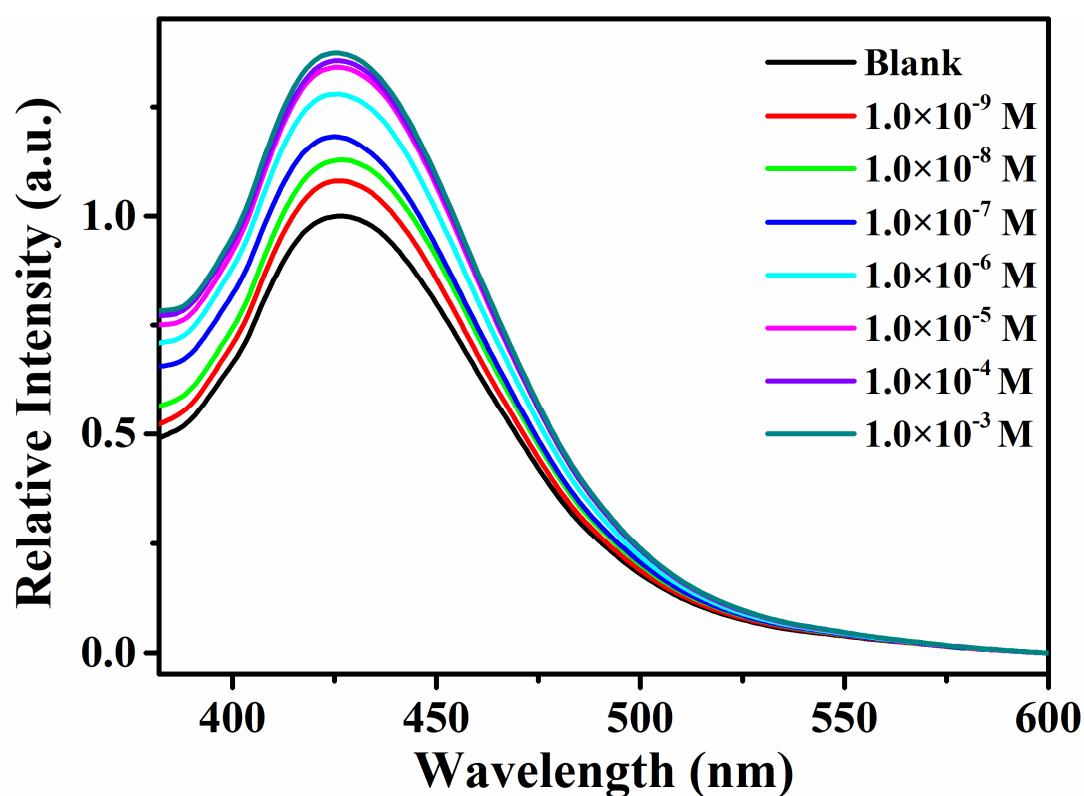

**Figure S18.** Liquid luminescence spectra of CdBPTC/DMF suspensions with different concentrations of Zn<sup>2+</sup> at room temperature,  $\lambda_{\text{ex}} = 337$  nm.

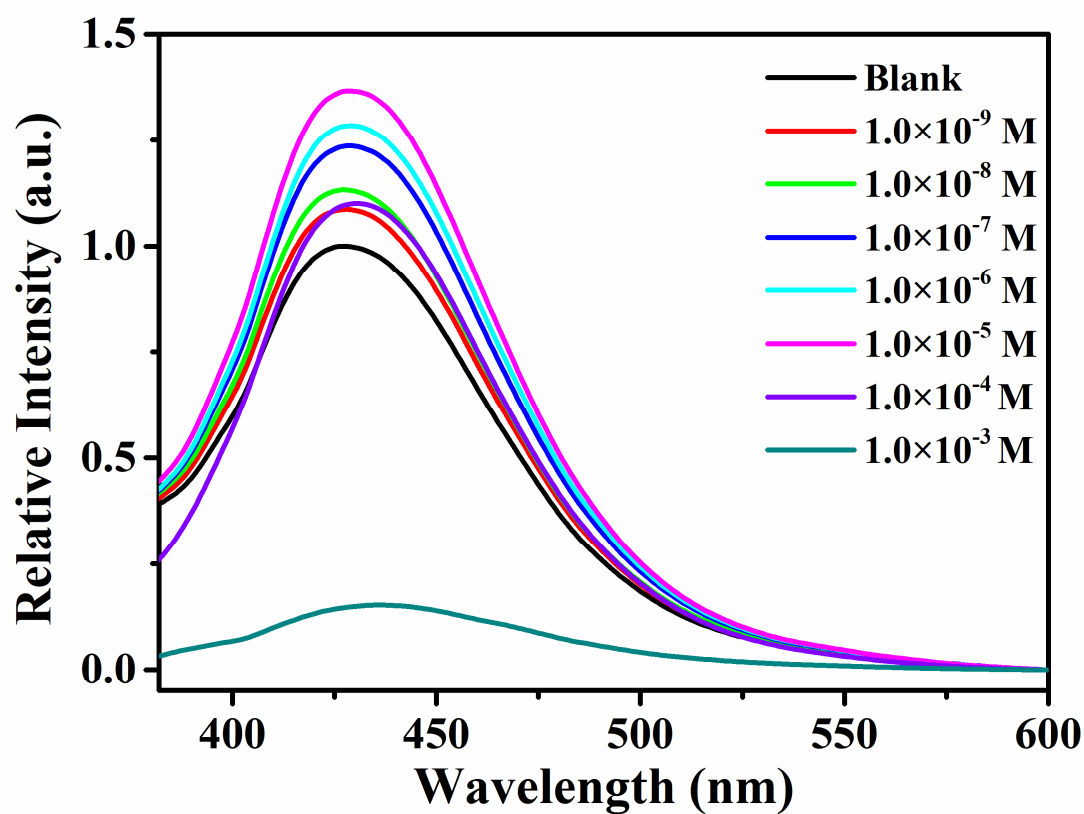

**Figure S19.** Liquid luminescence spectra of CdBPTC/DMF suspensions with different concentrations of Fe<sup>2+</sup> at room temperature,  $\lambda_{\text{ex}} = 337$  nm.

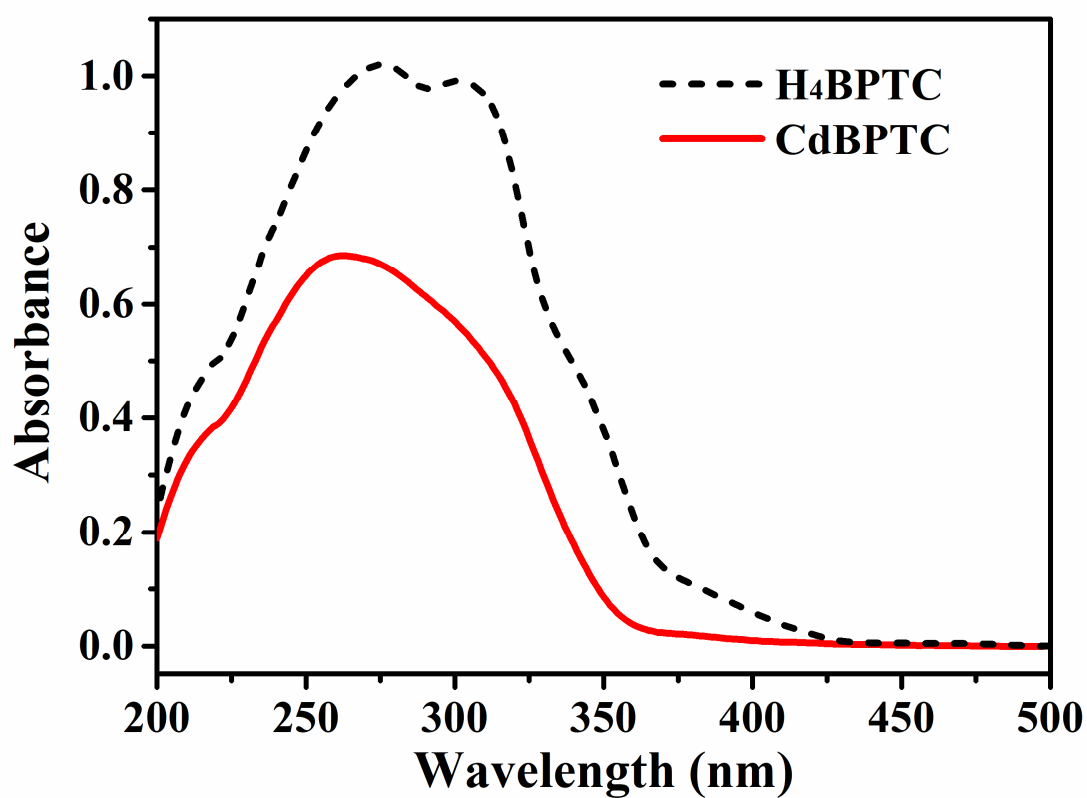

Figure S20. Solid UV-Vis spectra of CdBPTC and H<sub>4</sub>BPTC ligand.

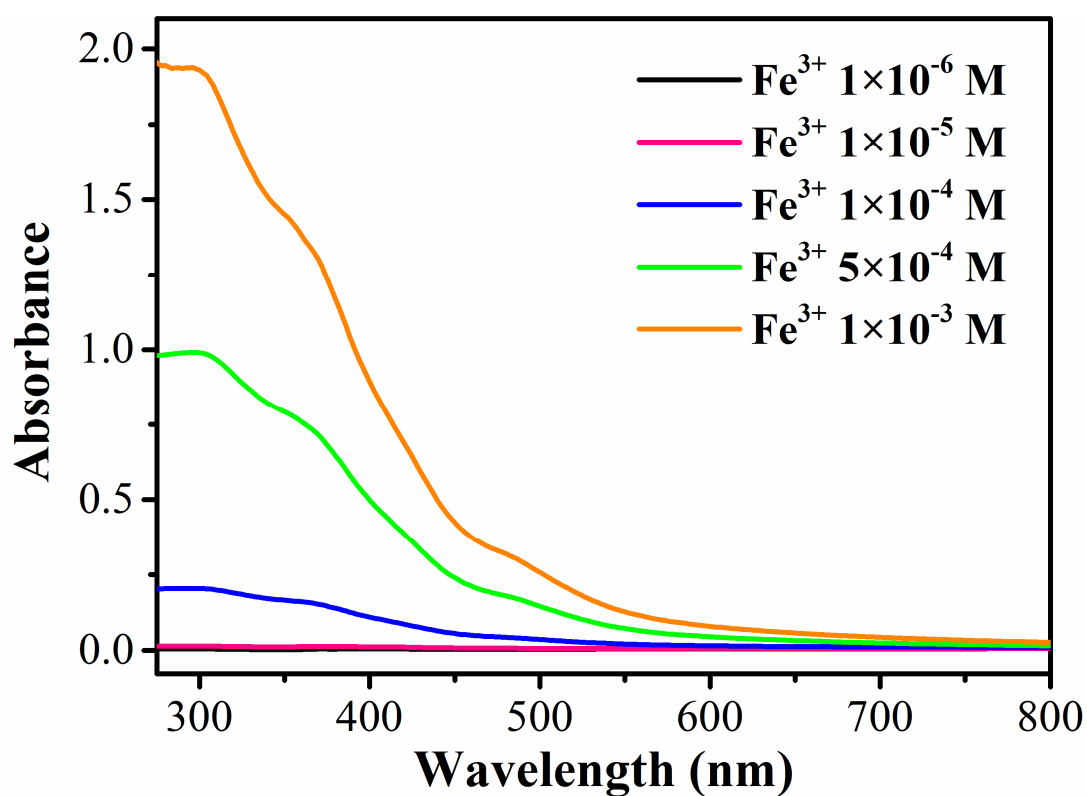

Figure S21. UV-Vis absorption spectra of Fe<sup>3+</sup> aqueous solutions with different concentrations.

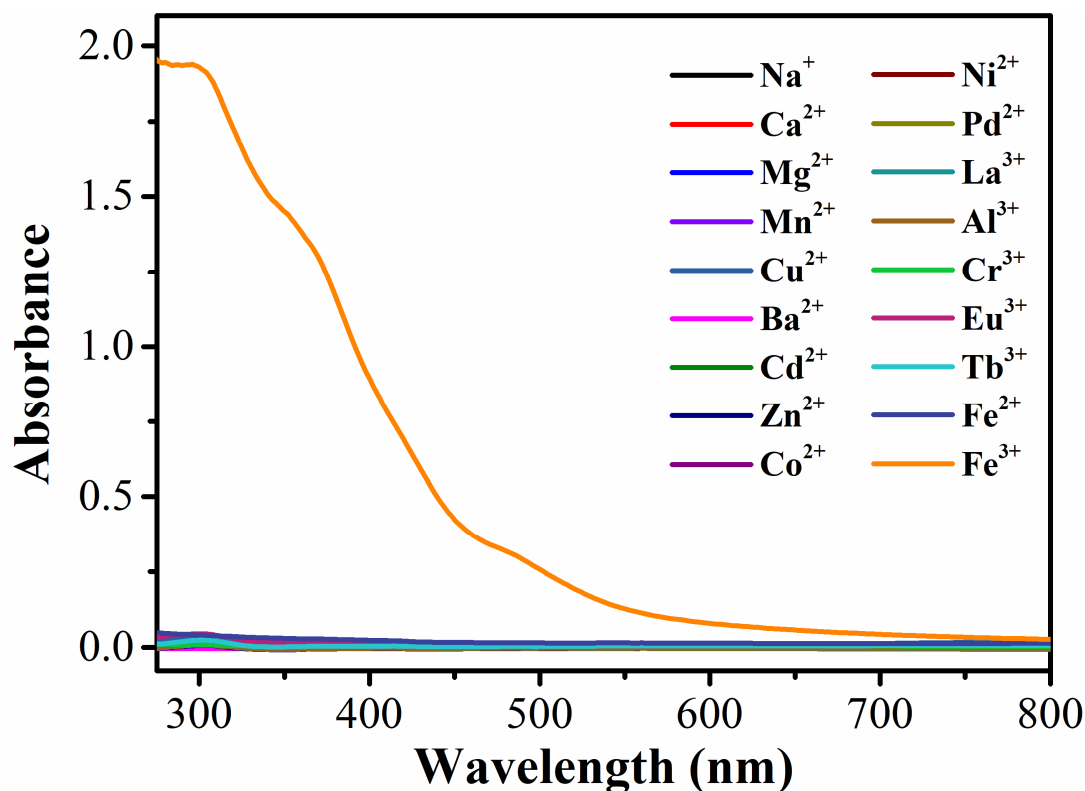

Figure S22. UV-Vis absorption spectra of different metal cations in aqueous solutions ( $1 \times 10^{-3} \text{ mol} \cdot \text{L}^{-1}$ ).

Table S1. Selected bond lengths (Å) and bond angles (°) of CdBPTC.

| CdBPTC                                |            |                                       |            |
|---------------------------------------|------------|---------------------------------------|------------|
| Cd1-O5 <sup>1</sup>                   | 2.313(7)   | Cd1-O6 <sup>1</sup>                   | 2.592(6)   |
| Cd1-O8 <sup>2</sup>                   | 2.271(6)   | Cd1-O3 <sup>3</sup>                   | 2.590(5)   |
| Cd1-O7 <sup>2</sup>                   | 2.533(4)   | Cd1-O1                                | 2.330(7)   |
| Cd1-O2                                | 2.461(4)   | Cd1-O4 <sup>3</sup>                   | 2.290(7)   |
| O5 <sup>1</sup> -Cd1-O7 <sup>2</sup>  | 135.1(2)   | O2-Cd1-O6 <sup>1</sup>                | 90.76(19)  |
| O5 <sup>1</sup> -Cd1-O2               | 86.1(2)    | O2-Cd1-C15 <sup>2</sup>               | 98.12(17)  |
| O5 <sup>1</sup> -Cd1-O6 <sup>1</sup>  | 54.4(2)    | O2-Cd1-O3 <sup>3</sup>                | 168.0(2)   |
| O5 <sup>1</sup> -Cd1-C15 <sup>2</sup> | 110.1(3)   | O6 <sup>1</sup> -Cd1-C15 <sup>2</sup> | 161.7(2)   |
| O5 <sup>1</sup> -Cd1-O3 <sup>3</sup>  | 81.99(19)  | O3 <sup>3</sup> -Cd1-O6 <sup>1</sup>  | 81.39(18)  |
| O5 <sup>1</sup> -Cd1-O1               | 127.64(19) | O3 <sup>3</sup> -Cd1-C15 <sup>2</sup> | 87.09(16)  |
| O8 <sup>2</sup> -Cd1-O5 <sup>1</sup>  | 82.6(3)    | O1-Cd1-O7 <sup>2</sup>                | 88.35(17)  |
| O8 <sup>2</sup> -Cd1-O7 <sup>2</sup>  | 52.87(19)  | O1-Cd1-O2                             | 53.8(2)    |
| O8 <sup>2</sup> -Cd1-O2               | 92.34(19)  | O1-Cd1-O6 <sup>1</sup>                | 90.2(2)    |
| O8 <sup>2</sup> -Cd1-O6 <sup>1</sup>  | 136.6(2)   | O1-Cd1-C15 <sup>2</sup>               | 107.9(2)   |
| O8 <sup>2</sup> -Cd1-C15 <sup>2</sup> | 27.8(2)    | O1-Cd1-O3 <sup>3</sup>                | 134.7(2)   |
| O8 <sup>2</sup> -Cd1-O3 <sup>3</sup>  | 87.27(17)  | O4 <sup>3</sup> -Cd1-O5 <sup>1</sup>  | 123.41(17) |
| O8 <sup>2</sup> -Cd1-O1               | 125.44(18) | O4 <sup>3</sup> -Cd1-O7 <sup>2</sup>  | 82.08(19)  |
| O8 <sup>2</sup> -Cd1-O4 <sup>3</sup>  | 120.7(2)   | O4 <sup>3</sup> -Cd1-O2               | 136.1(3)   |
| O7 <sup>2</sup> -Cd1-O6 <sup>1</sup>  | 166.1(2)   | O4 <sup>3</sup> -Cd1-O3 <sup>3</sup>  | 52.4(3)    |
| O7 <sup>2</sup> -Cd1-C15 <sup>2</sup> | 25.1(2)    | O4 <sup>3</sup> -Cd1-O6 <sup>1</sup>  | 84.04(19)  |
| O7 <sup>2</sup> -Cd1-O3 <sup>3</sup>  | 89.82(15)  | O4 <sup>3</sup> -Cd1-C15 <sup>2</sup> | 100.1(2)   |
| O4 <sup>3</sup> -Cd1-O1               | 82.6(3)    | O2-Cd1-O7 <sup>2</sup>                | 99.51(17)  |

<sup>1</sup> 1/2-Y, 1-X, 1/4+Z; <sup>2</sup> +Y, 1/2-X, 1/4+Z; <sup>3</sup> -1/2+X, 1/2-Y, +Z.
